# Supplementary material for: Compositional engineering of doped zero-dimensional zinc halide blue emitters for efficient X-ray scintillation
Source: Royal Society of Chemistry journal article supplement (doi:10.1039/d2qi00461e), 2022-01-01
Supplement: d2qi00461e1.pdf [file d2qi00461e1.pdf]

## Supporting Information

# Compositional Engineering of Doped Zero-dimensional Zinc Halide Blue Emitters for Efficient X-ray Scintillation

*Yingchun Zhou<sup>1</sup>, Quan Zhou<sup>1</sup>, Xiaowei Niu<sup>1</sup>, Zheng-Guang Yan<sup>1\*</sup>, Taifeng Lin<sup>2</sup>, Jiawen*

*Xiao<sup>1\*</sup> and Xiaodong Han<sup>1</sup>*

1-Institute of Microstructure and Property of Advanced Materials, Beijing Key Lab of Microstructure and Property of Advanced Materials, Faculty of Materials and Manufacturing, Beijing University of Technology, Beijing 100124, China

2-Faculty of Environment and Life, Beijing University of Technology, Beijing 100124, China

E-mail: yanzg@bjut.edu.cn; xiaojw@bjut.edu.cn; xdhan@bjut.edu.cn

**Table S1.** Composition of Cu-doped samples measured by ICP-AES.

| samples                                    | Cu/Zn precursors ratio | Cu content (at%, ICP) |
|--------------------------------------------|------------------------|-----------------------|
| Cu-doped Cs <sub>2</sub> ZnBr <sub>4</sub> | 2/3                    | 0.67                  |
|                                            | 3/3                    | 36                    |
|                                            | 4/3                    | 65                    |
|                                            | 5/3                    | 103                   |
|                                            | 6/3                    | 140                   |
| Cu-doped Cs <sub>2</sub> ZnCl <sub>4</sub> | 2/3                    | 0.30                  |
| Cu-doped Rb <sub>2</sub> ZnCl <sub>4</sub> | 2/3                    | 0.59                  |

$$\text{Cu/Zn precursors ratio} = \frac{\text{molar feed ratio of CuBr}}{\text{molar feed ratio of ZnBr}_2}$$

The content of Cu was expressed relative to that Zn, which was assumed to be 1.

$$\text{Cu content} = \frac{\text{Cu concentration measured by ICP}}{\text{Zn concentration measured by ICP}} \times 100\%$$

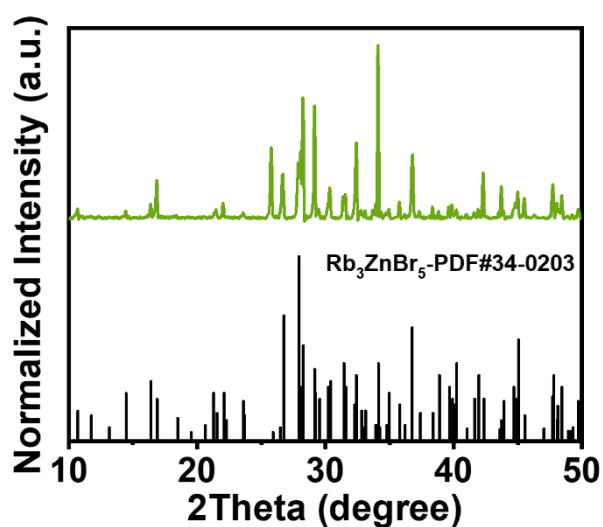**Figure S1.** XRD pattern of Rb<sub>3</sub>ZnBr<sub>5</sub>.

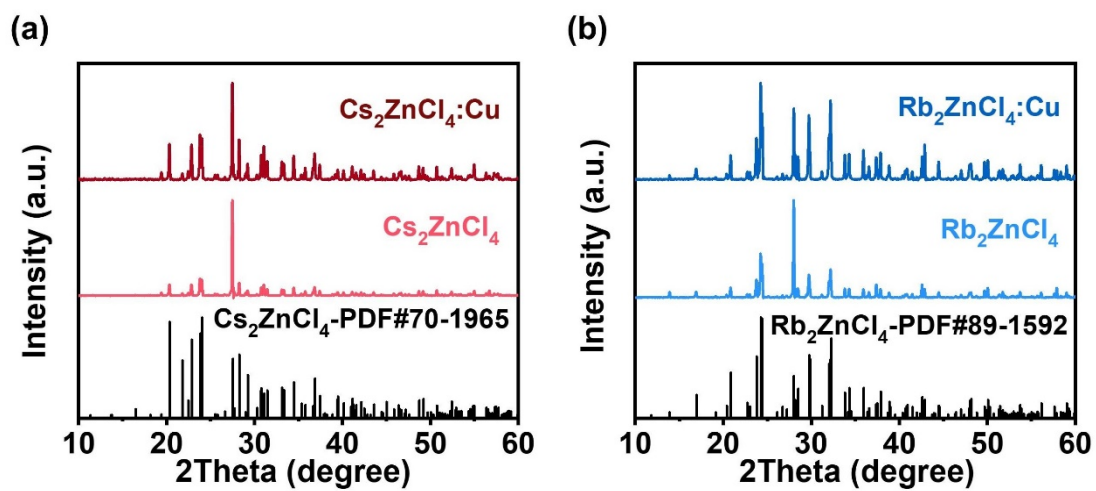

**Figure S2.** (a) XRD patterns of pristine Cs<sub>2</sub>ZnCl<sub>4</sub> and Cs<sub>2</sub>ZnCl<sub>4</sub>:Cu. (b) XRD patterns of pristine Rb<sub>2</sub>ZnCl<sub>4</sub> and Rb<sub>2</sub>ZnCl<sub>4</sub>:Cu.

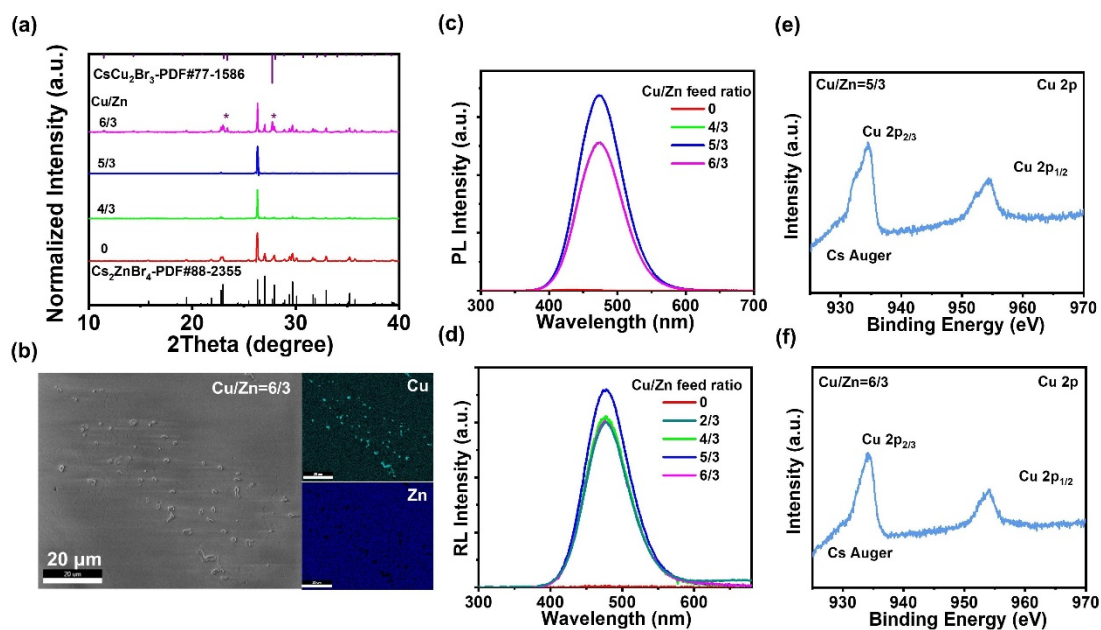

**Figure S3.** (a) XRD patterns of pristine Cs<sub>2</sub>ZnBr<sub>4</sub> and Cu-doped Cs<sub>2</sub>ZnBr<sub>4</sub> with different Cu to Zn precursors ratio. (b) SEM image and the element distribution analysis through EDS mapping of the as-prepared Cu-doped Cs<sub>2</sub>ZnBr<sub>4</sub> single crystals with Cu/Zn precursors ratio of 6/3 (Scale bar: 20 μm). (c) The PL spectra of pristine Cs<sub>2</sub>ZnBr<sub>4</sub> and Cu-doped Cs<sub>2</sub>ZnBr<sub>4</sub> with different Cu to Zn precursors ratio. (d) The RL spectra of pristine Cs<sub>2</sub>ZnBr<sub>4</sub> and Cu-doped Cs<sub>2</sub>ZnBr<sub>4</sub> with different Cu to Zn molar feed ratio. (e) High-resolution XPS spectrum of Cu 2p for Cu-doped Cs<sub>2</sub>ZnBr<sub>4</sub> single crystals with Cu/Zn precursors ratio of 5/3 and (f) 6/3.

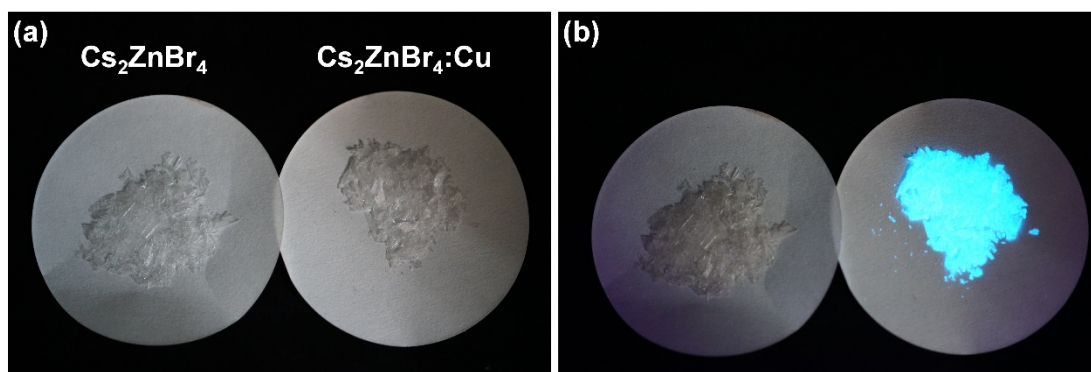

**Figure S4.** (a) The photographs of  $\text{Cs}_2\text{ZnBr}_4$  and  $\text{Cs}_2\text{ZnBr}_4:\text{Cu}$  under room light. (b) The photographs of  $\text{Cs}_2\text{ZnBr}_4$  and  $\text{Cs}_2\text{ZnBr}_4:\text{Cu}$  under 254 nm UV.

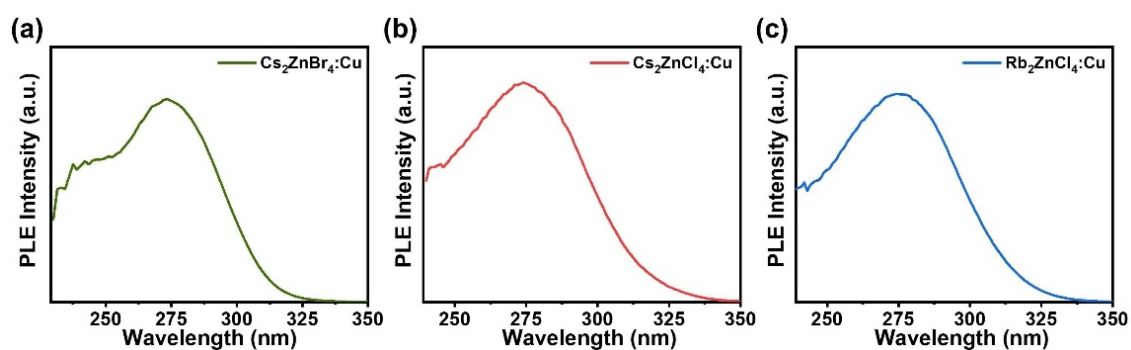

**Figure S5.** PLE spectra of  $\text{Cs}_2\text{ZnBr}_4:\text{Cu}$ ,  $\text{Cs}_2\text{ZnCl}_4:\text{Cu}$  and  $\text{Rb}_2\text{ZnCl}_4:\text{Cu}$ .

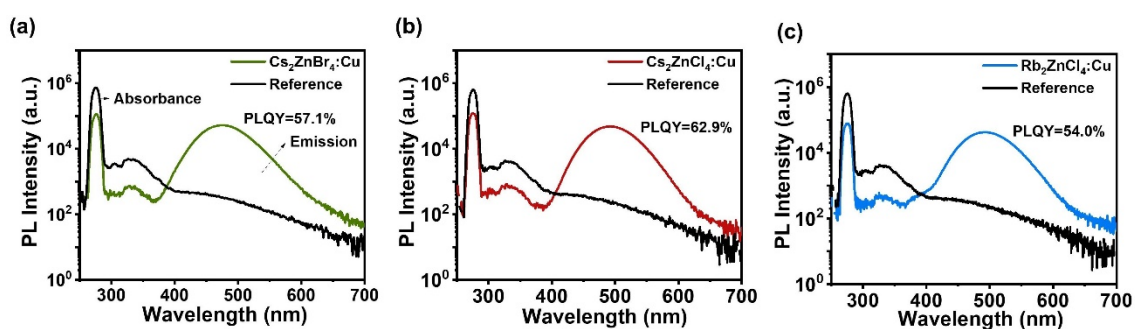

**Figure S6.** Absolute PL quantum yield (PLQY) measurement results of  $\text{Cs}_2\text{ZnBr}_4:\text{Cu}$ ,  $\text{Cs}_2\text{ZnCl}_4:\text{Cu}$  and  $\text{Rb}_2\text{ZnCl}_4:\text{Cu}$ .

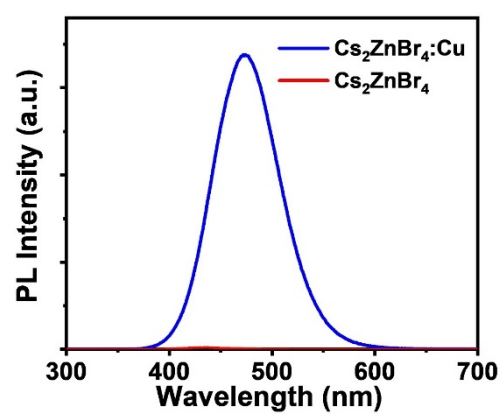

**Figure S7.** The PL spectra of  $\text{Cs}_2\text{ZnBr}_4$  and  $\text{Cs}_2\text{ZnBr}_4:\text{Cu}$ .

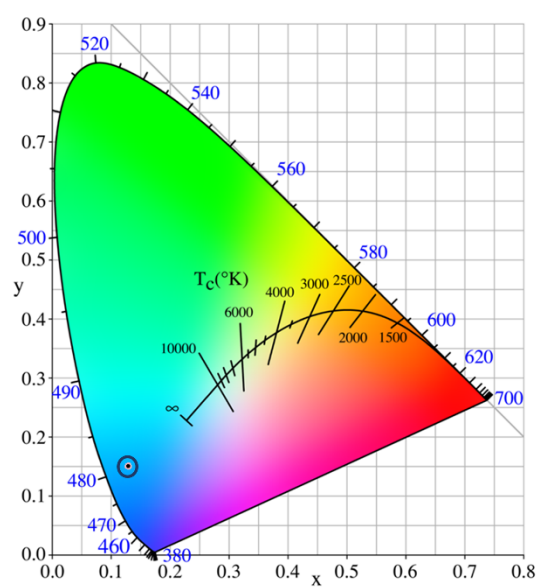

**Figure S8.** The CIE (International Commission on Illumination) diagram of  $\text{Cs}_2\text{ZnBr}_4:\text{Cu}$ . (0.1326,0.1458).

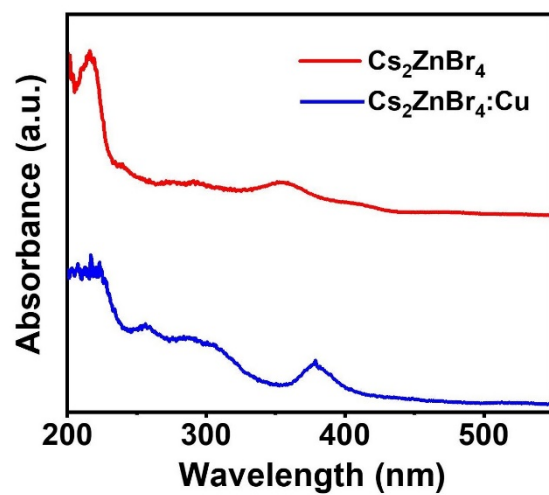

**Figure S9.** The UV-vis absorption spectra of  $\text{Cs}_2\text{ZnBr}_4$  and  $\text{Cs}_2\text{ZnBr}_4:\text{Cu}$ .

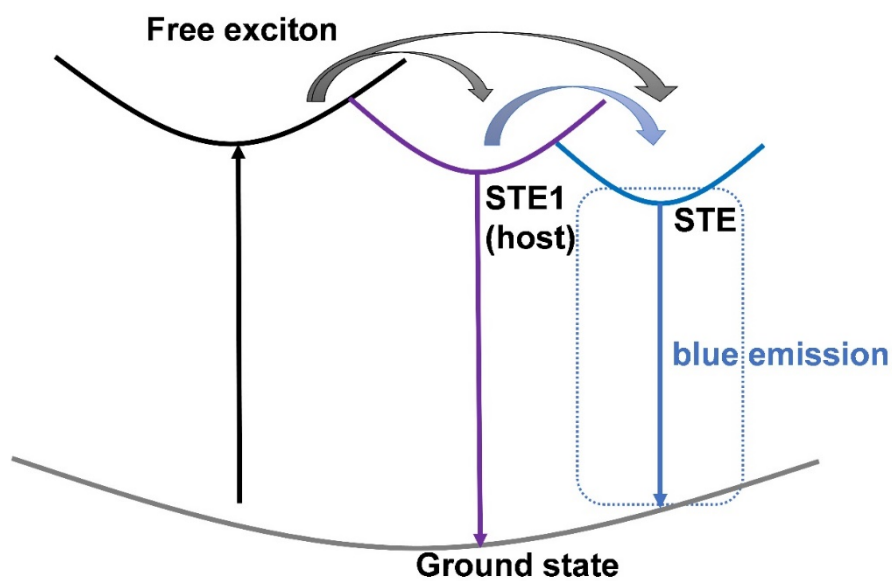

**Figure S10.** Schematic illustration of photophysical processes of the pure-blue emission in  $\text{Cs}_2\text{ZnBr}_4:\text{Cu}$ .

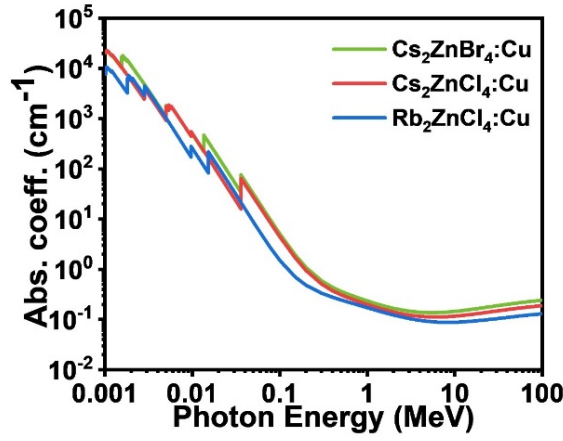

**Figure S11.** X-ray absorption coefficients of  $\text{Cs}_2\text{ZnBr}_4\text{:Cu}$ ,  $\text{Cs}_2\text{ZnCl}_4\text{:Cu}$  and  $\text{Rb}_2\text{ZnCl}_4\text{:Cu}$  as a function of photon energy from 1 keV to 100 MeV.

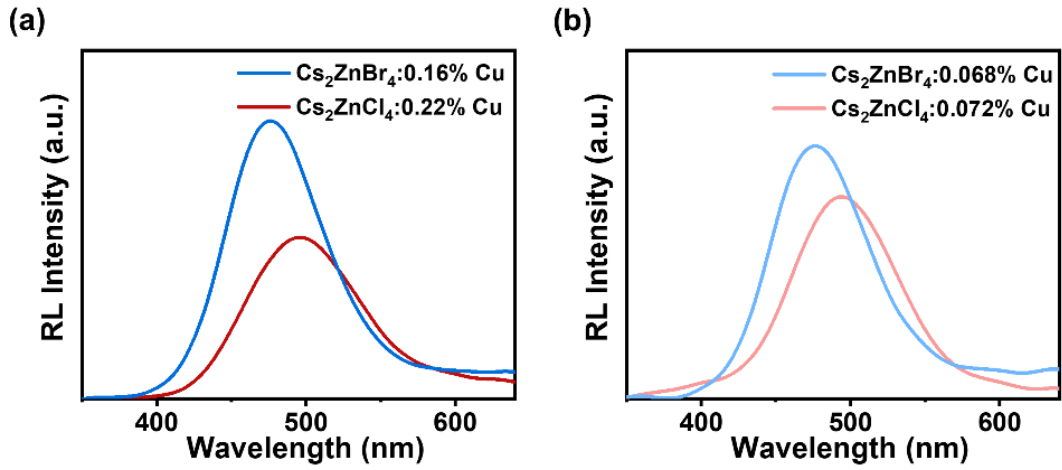

**Figure S12.** RL spectra of Cu-doped  $\text{Cs}_2\text{ZnBr}_4$  and Cu-doped  $\text{Cs}_2\text{ZnCl}_4$  samples with similar Cu content. RL spectra of Cu-doped  $\text{Cs}_2\text{ZnBr}_4$  and Cu-doped  $\text{Cs}_2\text{ZnCl}_4$  samples with (a) the relatively higher and (b) the relatively lower Cu content.



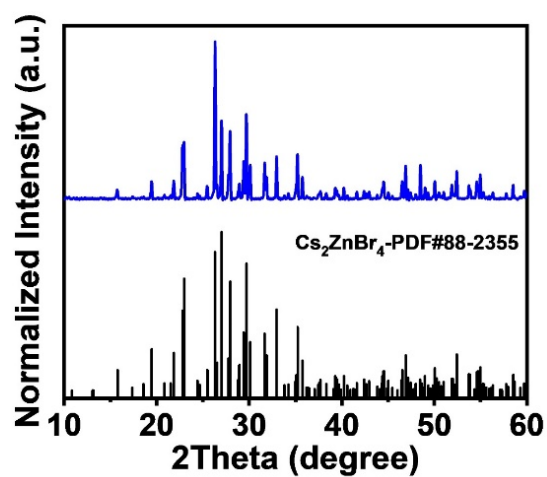

**Figure S13.** XRD pattern  $\text{Cs}_2\text{ZnBr}_4\text{:Cu}$  after storing in ambient atmosphere for four months.

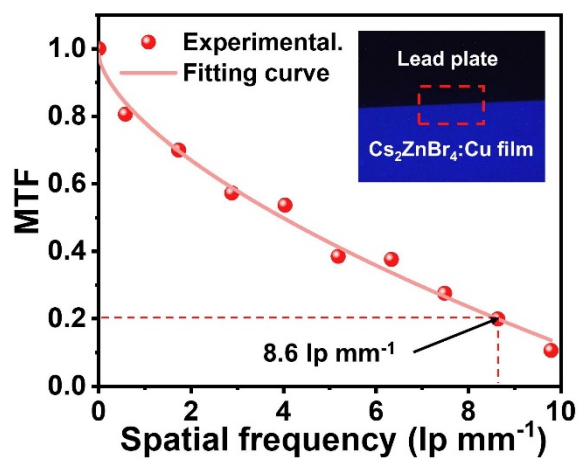

**Figure S14.** Modulation transfer function (MTF) curve of  $\text{Cs}_2\text{ZnBr}_4\text{:Cu}$  film.
